# Supplementary material for: Patient empowerment and general self-efficacy in patients with coronary heart disease: a cross-sectional study
Source: PubMed Central journal article supplement (PMC5975271; doi:10.1186/s12875-018-0749-y), 2018-05-30
Supplement: 12875_2018_749_MOESM1_ESM.pdf [file 12875_2018_749_MOESM1_ESM.pdf]

# The General Self-Efficacy Scale (GSE)

Authors: [Ralf Schwarzer](#) & [Matthias Jerusalem](#)

The Scale is available at <http://userpage.fu-berlin.de/~health/engscal.htm>

|    |                                                                                       |
|----|---------------------------------------------------------------------------------------|
| 1  | I can always manage to solve difficult problems if I try hard enough.                 |
| 2  | If someone opposes me, I can find the means and ways to get what I want.              |
| 3  | It is easy for me to stick to my aims and accomplish my goals.                        |
| 4  | I am confident that I could deal efficiently with unexpected events.                  |
| 5  | Thanks to my resourcefulness, I know how to handle unforeseen situations.             |
| 6  | I can solve most problems if I invest the necessary effort.                           |
| 7  | I can remain calm when facing difficulties because I can rely on my coping abilities. |
| 8  | When I am confronted with a problem, I can usually find several solutions.            |
| 9  | If I am in trouble, I can usually think of a solution.                                |
| 10 | I can usually handle whatever comes my way.                                           |

**Response Format:**

1 = Not at all true   2 = Hardly true   3 = Moderately true   4 = Exactly true
